# Supplementary material
Source: PubMed Central journal article supplement (PMC5496007)
Supplement: NIHMS865126-supplement-supplement_1.pdf [file NIHMS865126-supplement-supplement_1.pdf]

**Table E1.** Comparison of Observed Patterns in Circulating Cytokine Levels after Treatment for Markers Overlapping between Two Assay Kits: Human Angiogenesis 9-Plex and Human Cytokine 27-Plex

|                   | Percent with $\geq$ 50% Spike after Treatment | Percent with No Major Spike after Treatment | Percent Undetermined |
|-------------------|-----------------------------------------------|---------------------------------------------|----------------------|
| VEGF (9-Plex)     | 68                                            | 18                                          | 14                   |
| VEGF (27-Plex)    | 59                                            | 32                                          | 9                    |
| PDGF-BB (9-Plex)  | 64                                            | 32                                          | 5                    |
| PDGF-BB (27-Plex) | 55                                            | 41                                          | 5                    |
| IL-8 (9-Plex)     | 77                                            | 23                                          | 0                    |
| IL-8 (27-Plex)    | 77                                            | 23                                          | 0                    |

IL-8 = interleukin-8, PDGF-BB = platelet-derived growth factor subunit BB, VEGF = vascular endothelial growth factor.

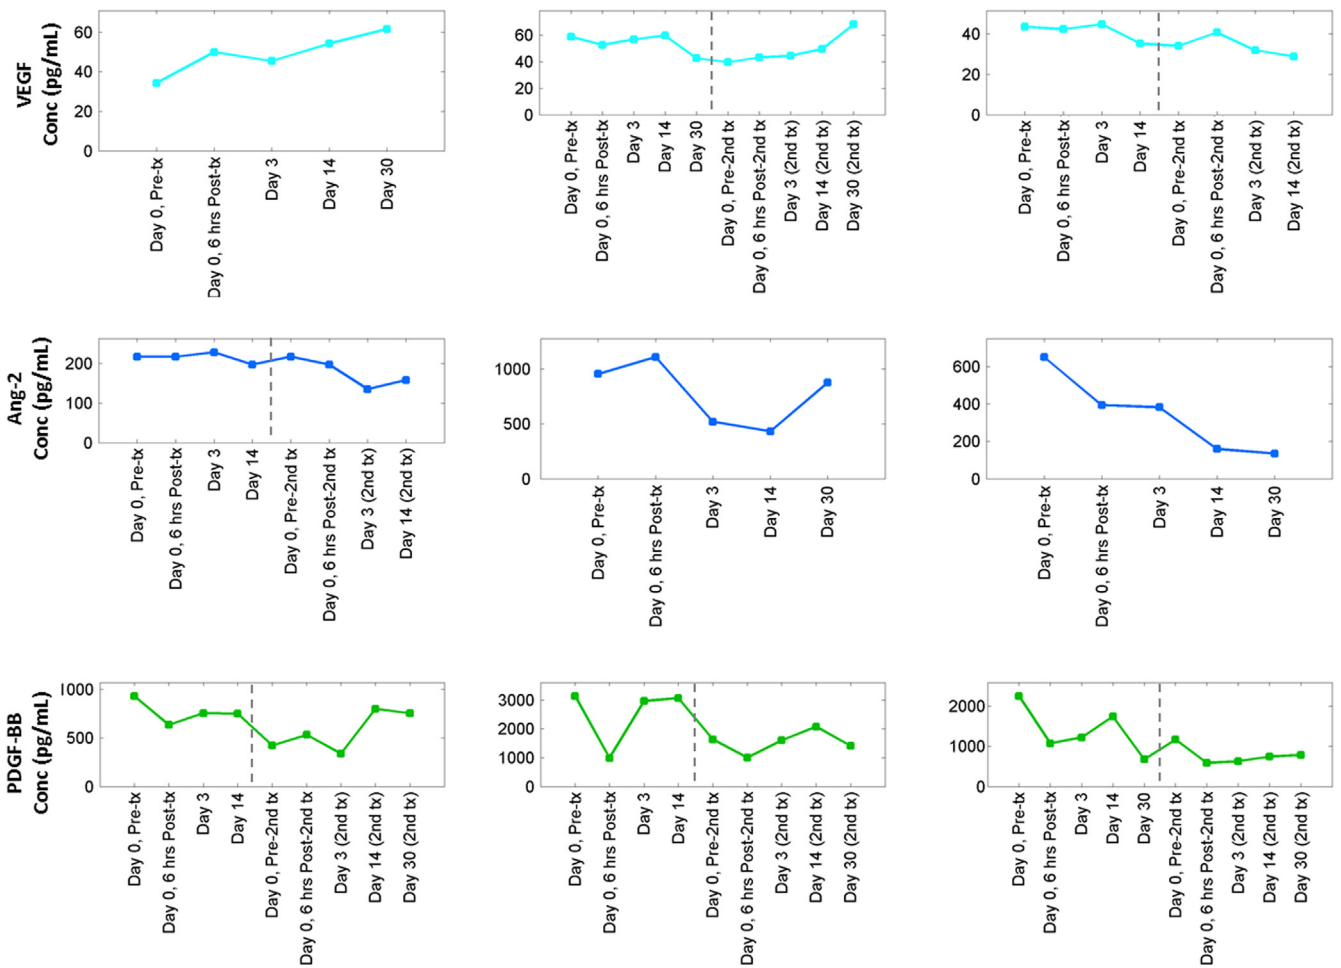

**Figure E1.** Examples of patients with minimal changes or declining levels in circulating angiogenic cytokines after radioembolization therapy. The first row illustrates representative changes in VEGF from three patients after treatment, the second row represents Ang-2, and the third row represents PDGF-BB. Points correspond to samples drawn at specific time points after first and second radioembolization treatments. In contrast to the spiking fluctuations shown in Figure 3, the examples shown here demonstrate declining or minimally increasing levels in cytokines after treatment. Conc = concentration, Tx = treatment.
